# Supplementary material for: Canonical PI3Kγ signaling in myeloid cells restricts Trypanosoma cruzi infection and dampens chagasic myocarditis
Source: PubMed Central journal article supplement (PMC5904108; doi:10.1038/s41467-018-03986-3), 2018-04-17
Supplement: 41467_2018_3986_MOESM1_ESM.pdf [file 41467_2018_3986_MOESM1_ESM.pdf]

**Supplementary Information for**

**Canonical PI3K $\gamma$  signaling in myeloid cells restricts *Trypanosoma cruzi* infection and dampens chagasic myocarditis**

Silva *et al.*,

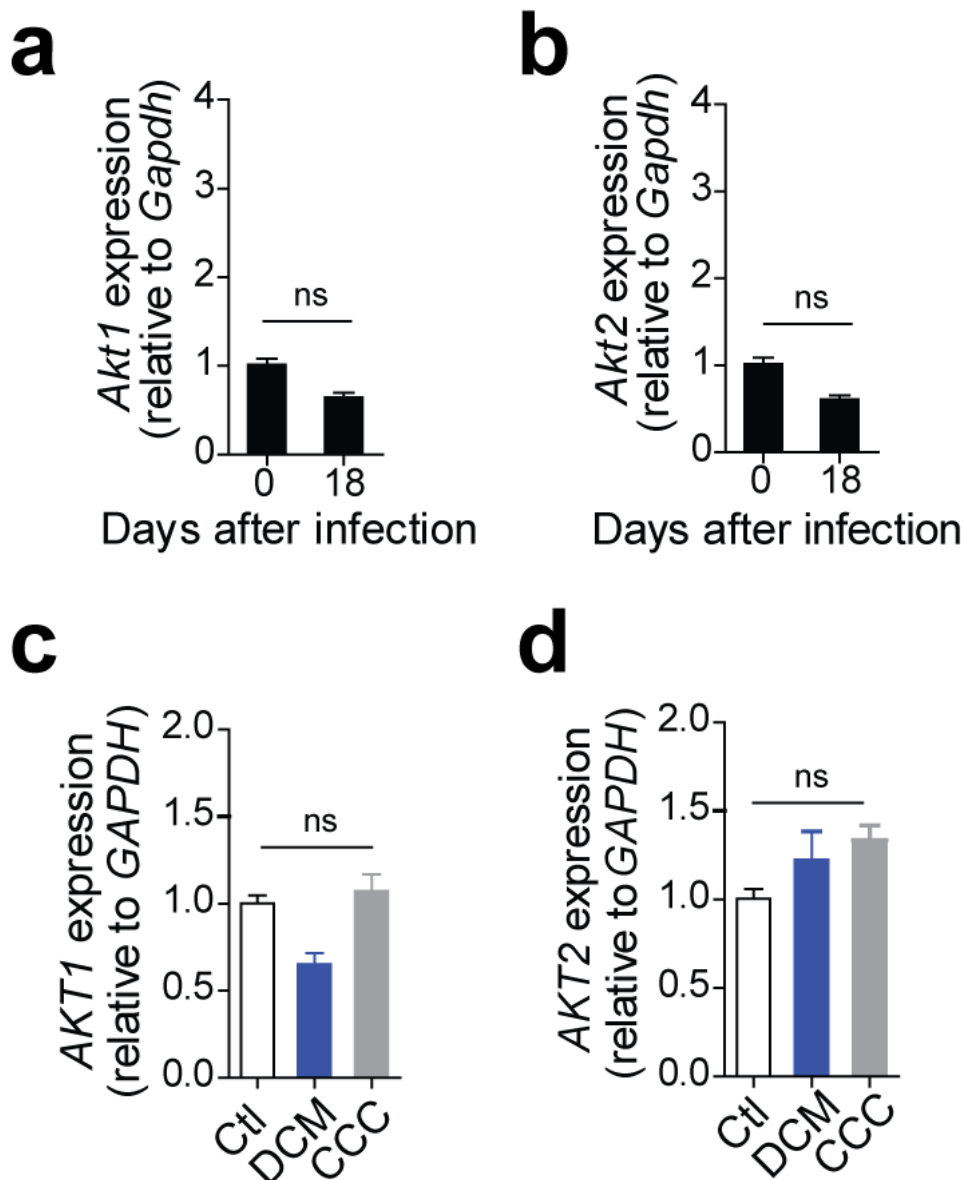

**Supplementary Figure 1. AKT1 and AKT2 expression in the heart tissue of mice and humans infected with *T. cruzi*.** (a-b) RT-PCR analysis of the mRNA expression of *Akt1* (a) and *Akt2* (b) genes in the heart tissue of C57BL/6 non-infected mice (n=7) or 18 days post infection with *T. cruzi* Y strain (n=11). (c-d) RT-PCR analysis of the mRNA expression of *AKT1* (c) and *AKT2* (d) genes in the heart tissue of Ctl (n=5); DCM (n=10) and CCC (n=10) patients. *Gapdh/GAPDH* was used as a housekeeping gene. ns=no statistical significance (a-d). (Unpaired Student's *t*-test in a,b and one-way ANOVA with Tukey's post-hoc test in c,d). Data are from one experiment (c,d) or representative of two (a,b) independent experiments (mean  $\pm$  s.e.m in a-d).

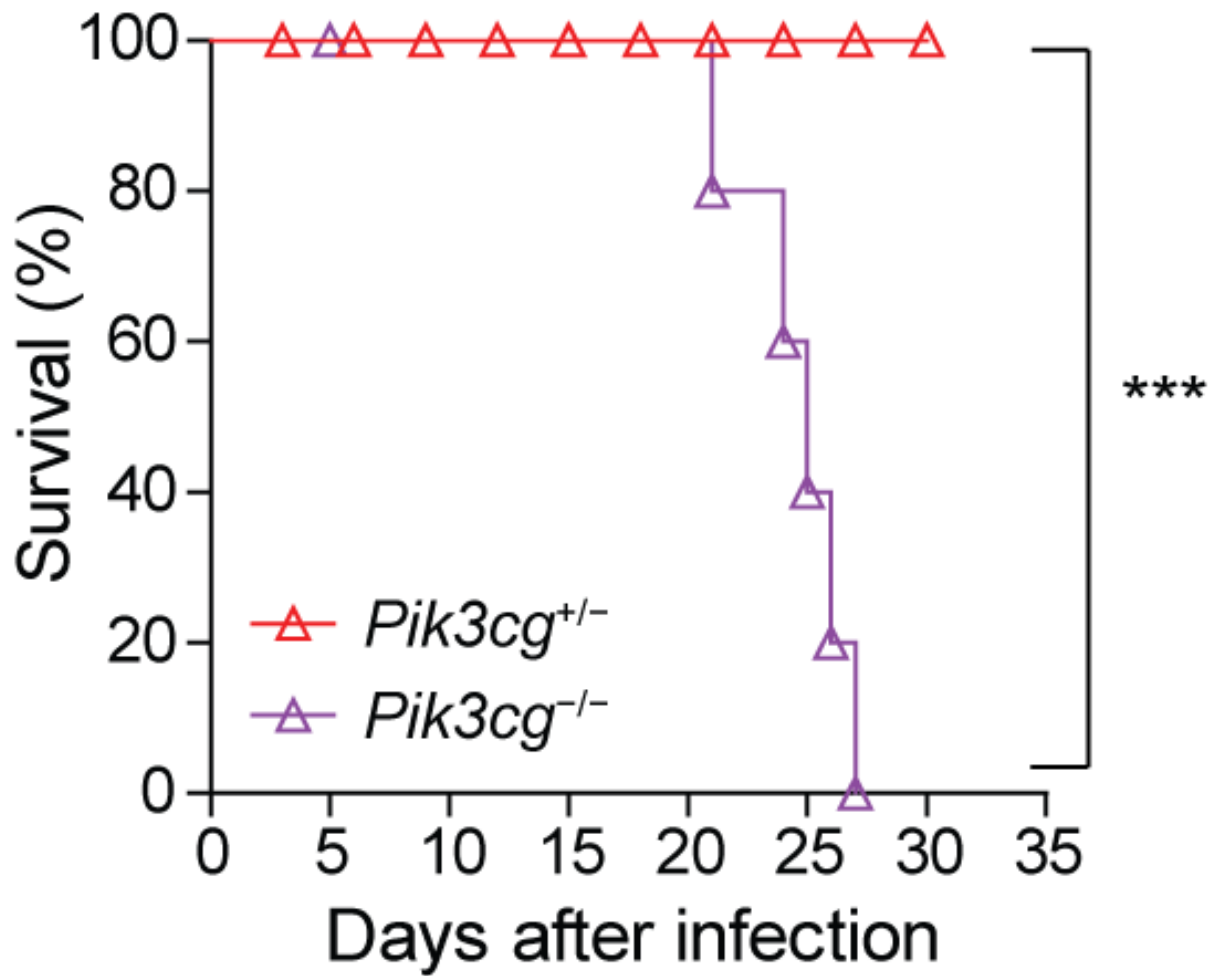

**Supplementary Figure 2. Susceptibility to *T. cruzi* infection of *Pik3cg*<sup>-/-</sup> and *Pik3cg*<sup>+/-</sup> mice.** Survival rate of homozygous *Pik3cg*<sup>-/-</sup> (n=5) and heterozygous *Pik3cg*<sup>+/-</sup> (n=10) infected with 10<sup>3</sup> trypomastigote forms of *T. cruzi* Y strain. \*\*\**P*<0.001 (Mantel-Cox log-rank test). Data are representative of two independent experiments.

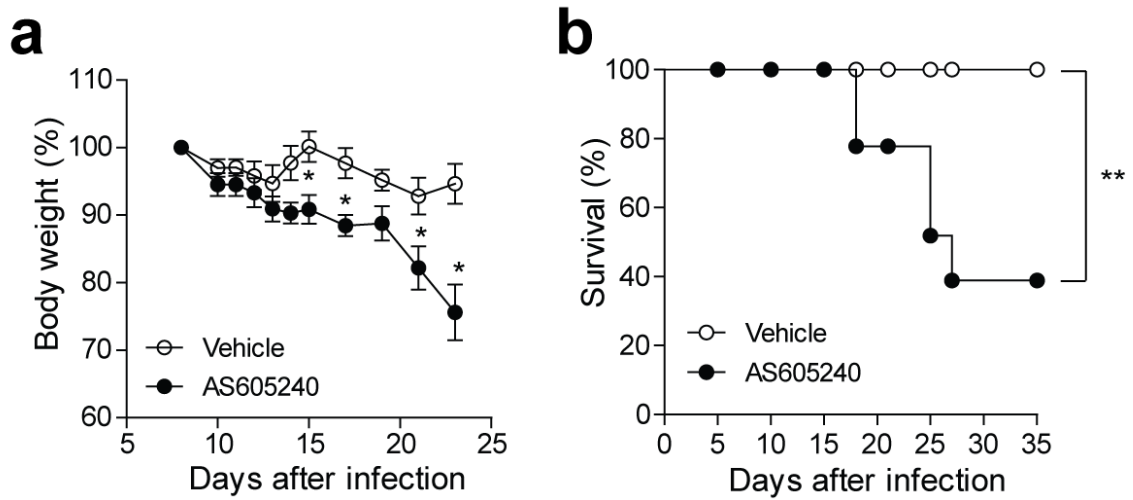

**Supplementary Figure 3. Susceptibility of *T. cruzi* infected C57BL/6 mice treated with PI3K $\gamma$  inhibitor.** Body weight (**a**) and survival rate (**b**) of WT mice treated with the selective PI3K $\gamma$  inhibitor AS605240 (n=8) or with vehicle (n=8). \* $P$ <0.05 and \*\* $P$ <0.01 (Student's  $t$  test in **a** and Mantel-Cox log-rank test in **b**). Data are representative of two (**a,b**) independent experiments (mean  $\pm$  s.e.m in **a**).

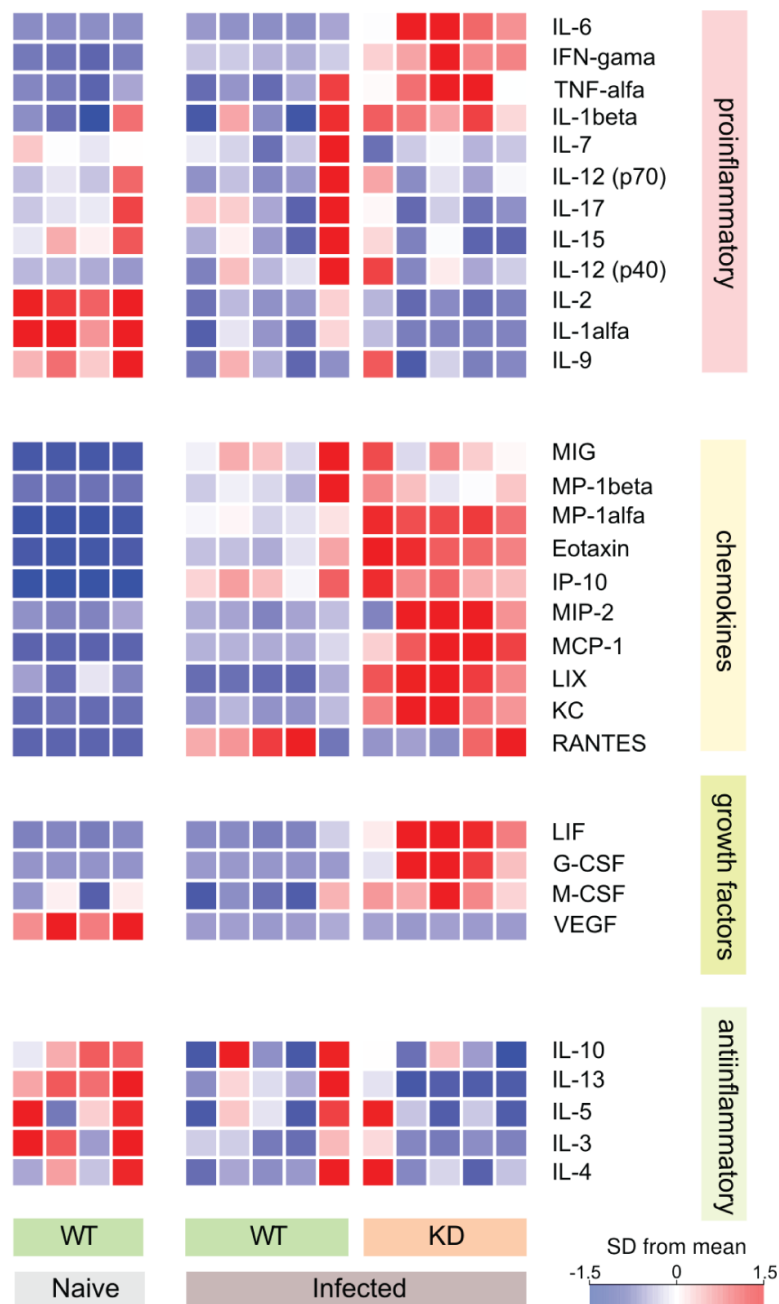

**Supplementary Figure 4. Heat map related to cytokines and chemokines measurement in the heart of infected WT and *Pik3cg*<sup>KD/KD</sup> mice.** Multiplex analysis of cytokines and chemokines produced in the heart tissue of WT and *Pik3cg*<sup>KD/KD</sup> mice before (n=4) and after (n=5) infection with 10<sup>3</sup> trypomastigote forms of *T. cruzi* Y strain. Data are from one experiment.

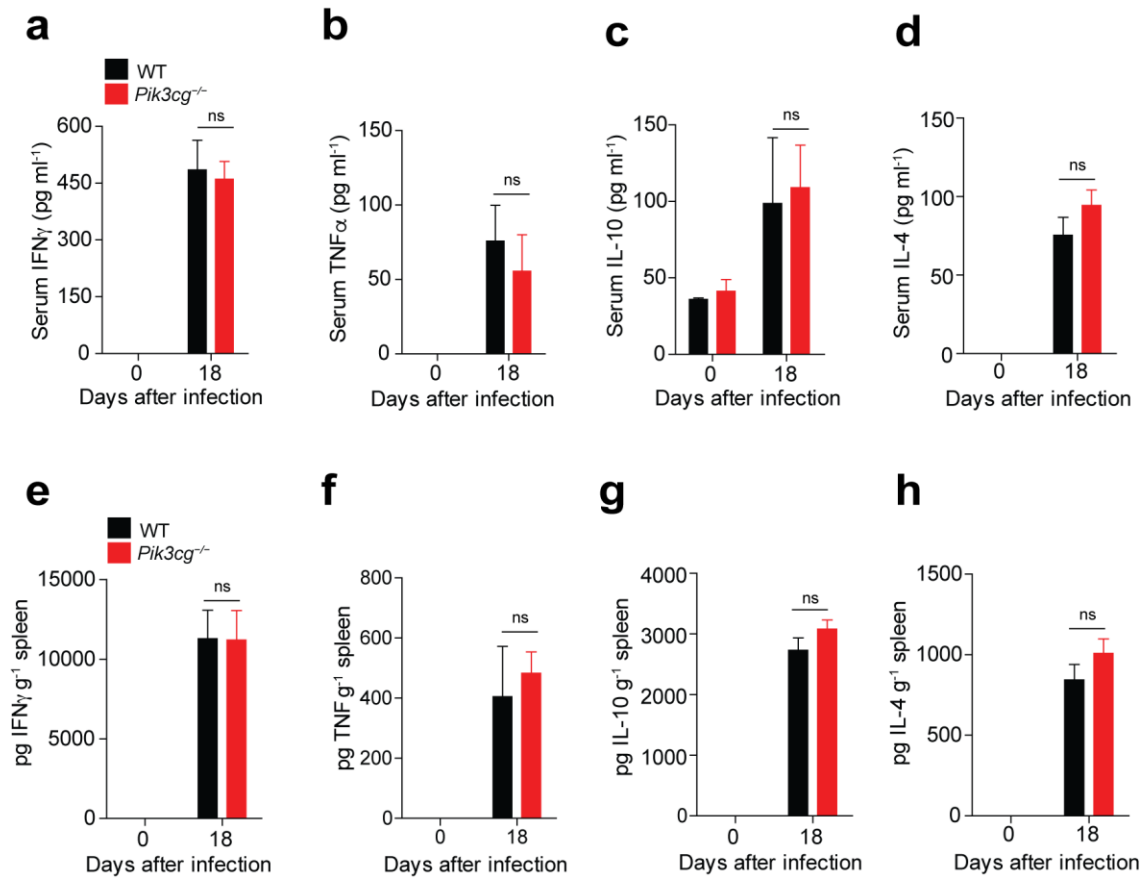

**Supplementary Figure 5. Cytokine measurements in the serum and spleen of *Pik3cg* $^{-/-}$  mice after *T. cruzi* infection.** ELISA assay to measure the levels of IFN- $\gamma$ , TNF- $\alpha$ , IL-10 and IL-4 cytokines in the serum (**a-d**) and spleen (**e-h**) of WT (n=5) and *Pik3cg* $^{-/-}$  (n=6) naïve mice or 18 days post infection with 10 $^3$  trypomastigote forms of *T. cruzi* Y strain. ns = no statistical significance (unpaired Student's *t*-test in **a-h**). Data are representative of two (**a-h**) independent experiments (mean  $\pm$  s.e.m in **a-h**).

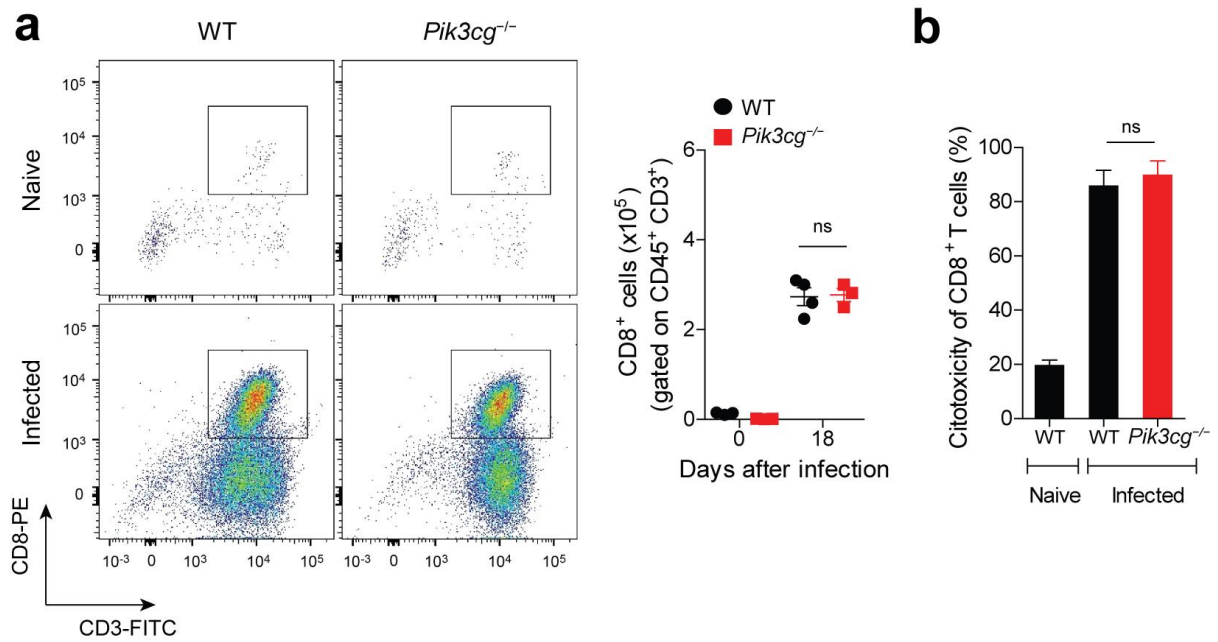

**Supplementary Figure 6. Profile of CD8<sup>+</sup> T-cell infiltration in the heart tissue of WT and *Pik3cg<sup>-/-</sup>* infected mice.** (a) Representative flow cytometry plots for the analysis of CD8 staining and quantification of the number of positive cells in the heart tissue of WT (n=5) and *Pik3cg<sup>-/-</sup>* (n=4) naïve mice or infected with 10<sup>3</sup> trypomastigote forms of *T. cruzi* Y strain. (b) *In vivo* assay of cytotoxicity of CD8<sup>+</sup> cells from WT (n=4) and *Pik3cg<sup>-/-</sup>* (n=4) mice infected with *T. cruzi*. ns=no statistical significance (unpaired Student's *t*-test in a-b). Data are representative of two (b) or three (a) independent experiments (mean ± s.e.m in a-b).

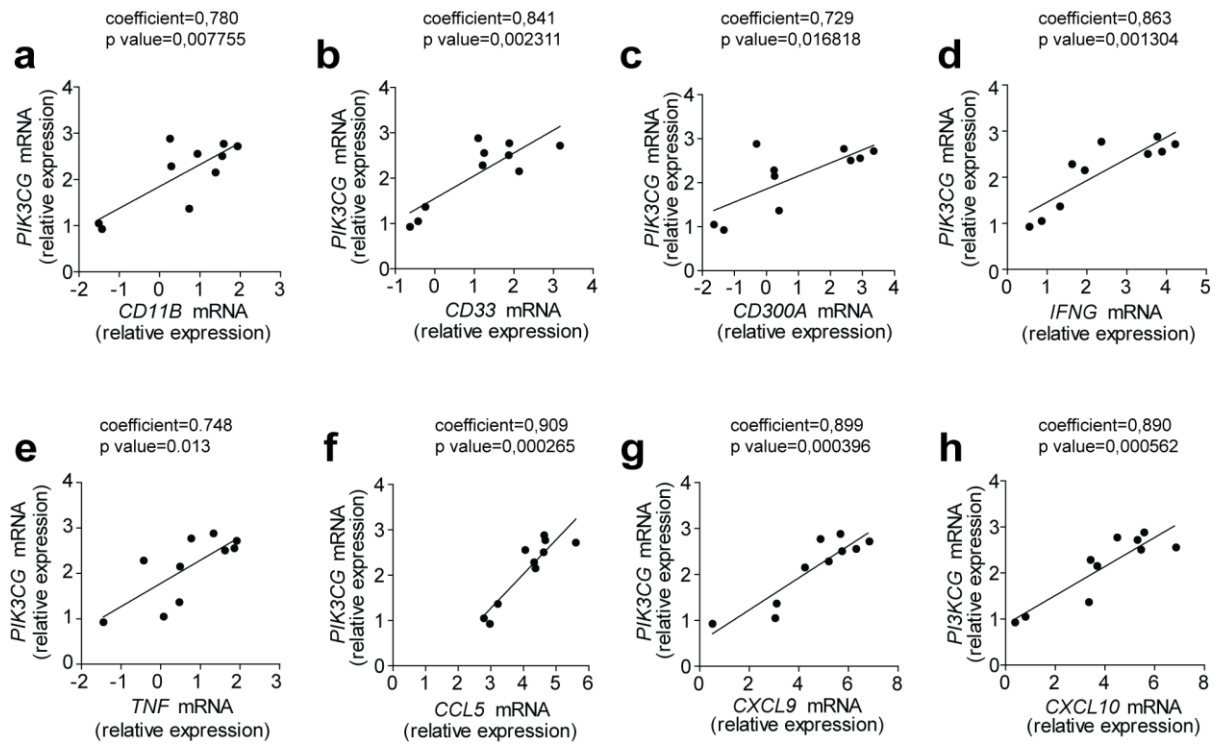

**Supplementary Figure 7. Correlation between PI3K $\gamma$  relative expression and markers of inflammation in the heart tissue of CCC patients.** (a-h) The transcriptome data set was used to perform a Spearman correlation analysis between the relative expression of the *PIK3CG* gene and several markers of inflammation in the heart tissue of CCC (n=10) patients. Pearson correlation coefficients and *P* values are shown in the panels.



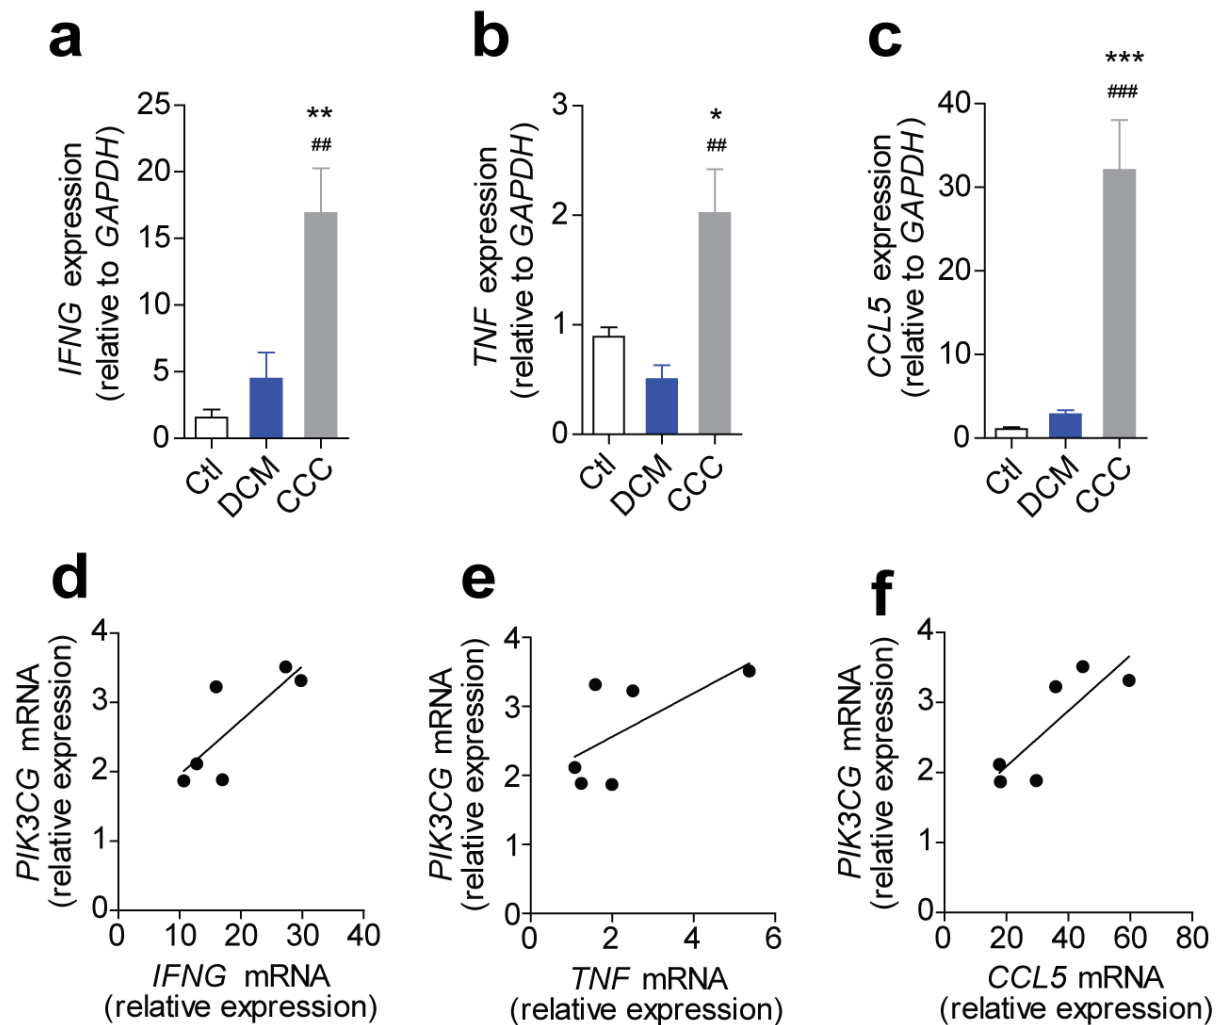

**Supplementary Figure 8. Cytokines/chemokines expression and correlation with PI3K $\gamma$  expression in the heart tissue of CCC patients.** (a-c) RT-PCR analysis of the mRNA expression of (a) *IFNG*, (b) *TNF*, and (c) *CCL5/RANTES* genes in the heart tissue of Ctl (n=5); DCM (n=6) and CCC (n=6) patients. *GAPDH* was used as a housekeeping gene. \* $P < 0.05$ , \*\* $P < 0.01$  and \*\*\* $P < 0.001$  relative to Ctl and ## $P < 0.01$  and ### $P < 0.001$  relative to DCM (one-way ANOVA with Tukey's post-hoc test in a-c). (d-f) Pearson correlation analysis between the gene expression of cytokines/chemokines and *PIK3CG* in the heart tissue of CCC (n=6) patients. Data are from one experiment in a-f (mean  $\pm$  s.e.m in a-c).

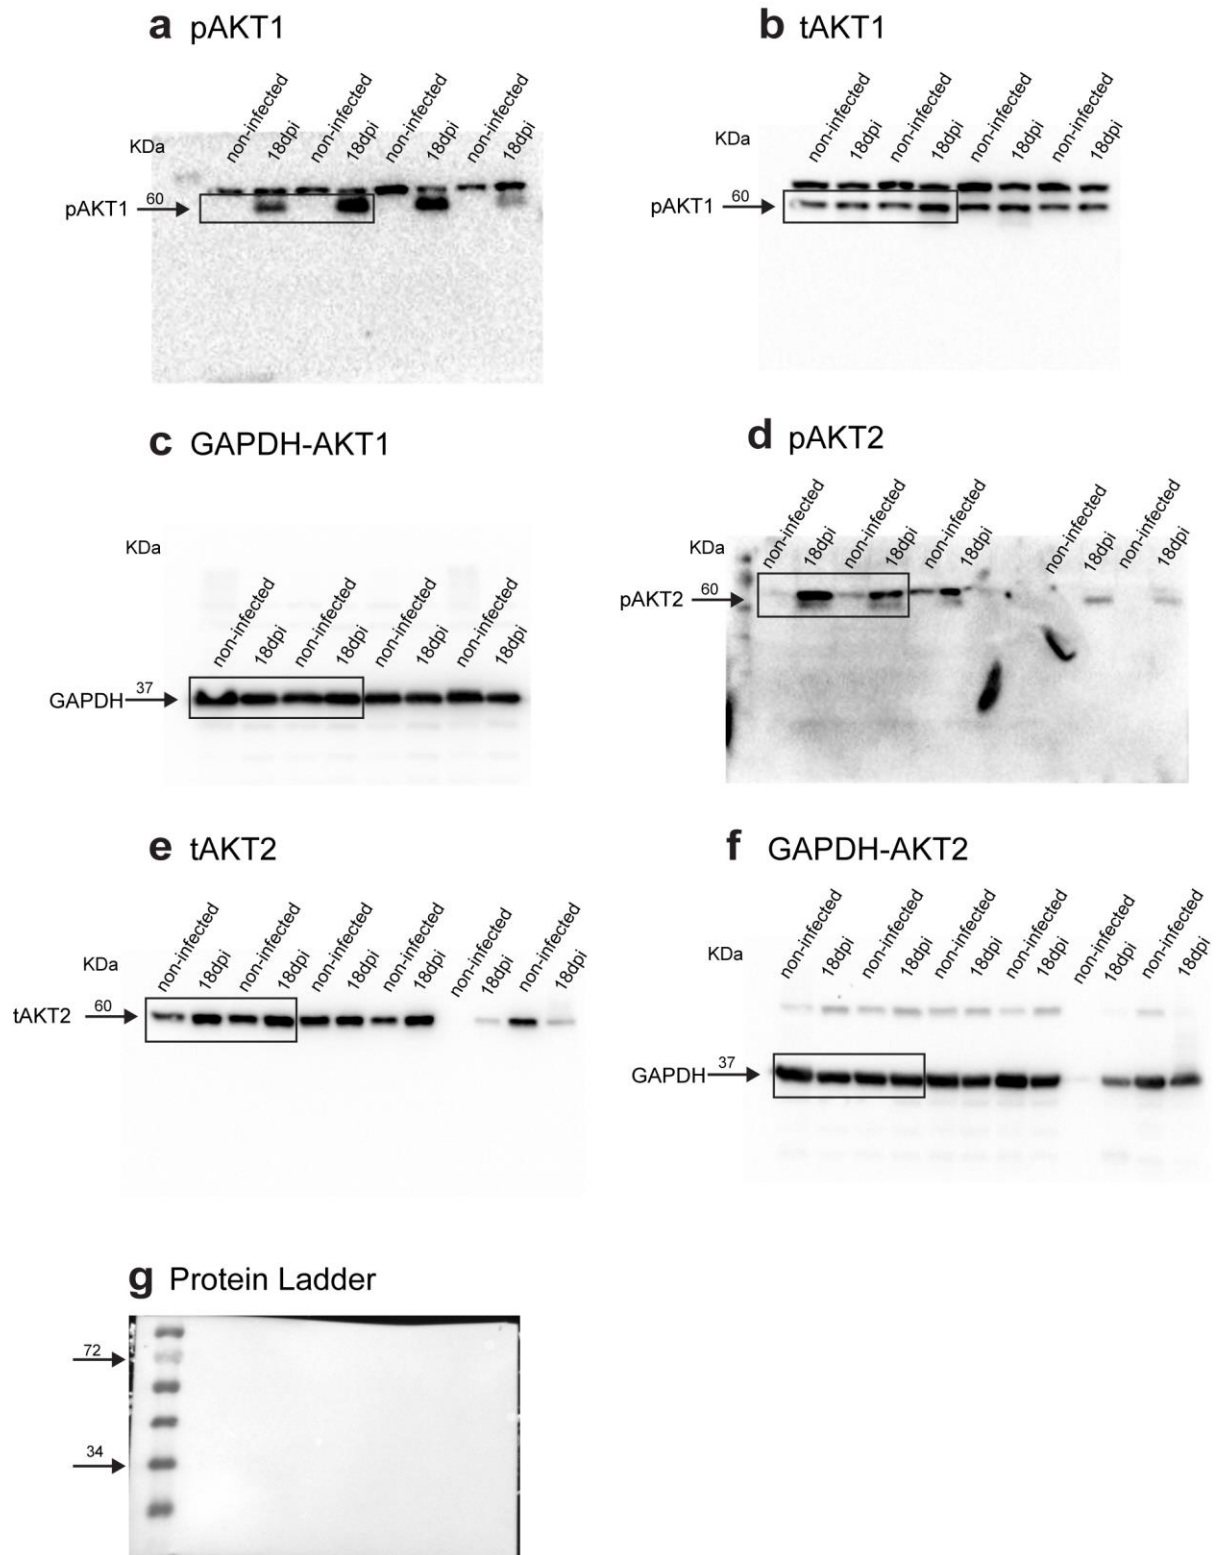

**Supplementary Figure 9. Uncropped scans of the western blots presented in main figure**

**1.**

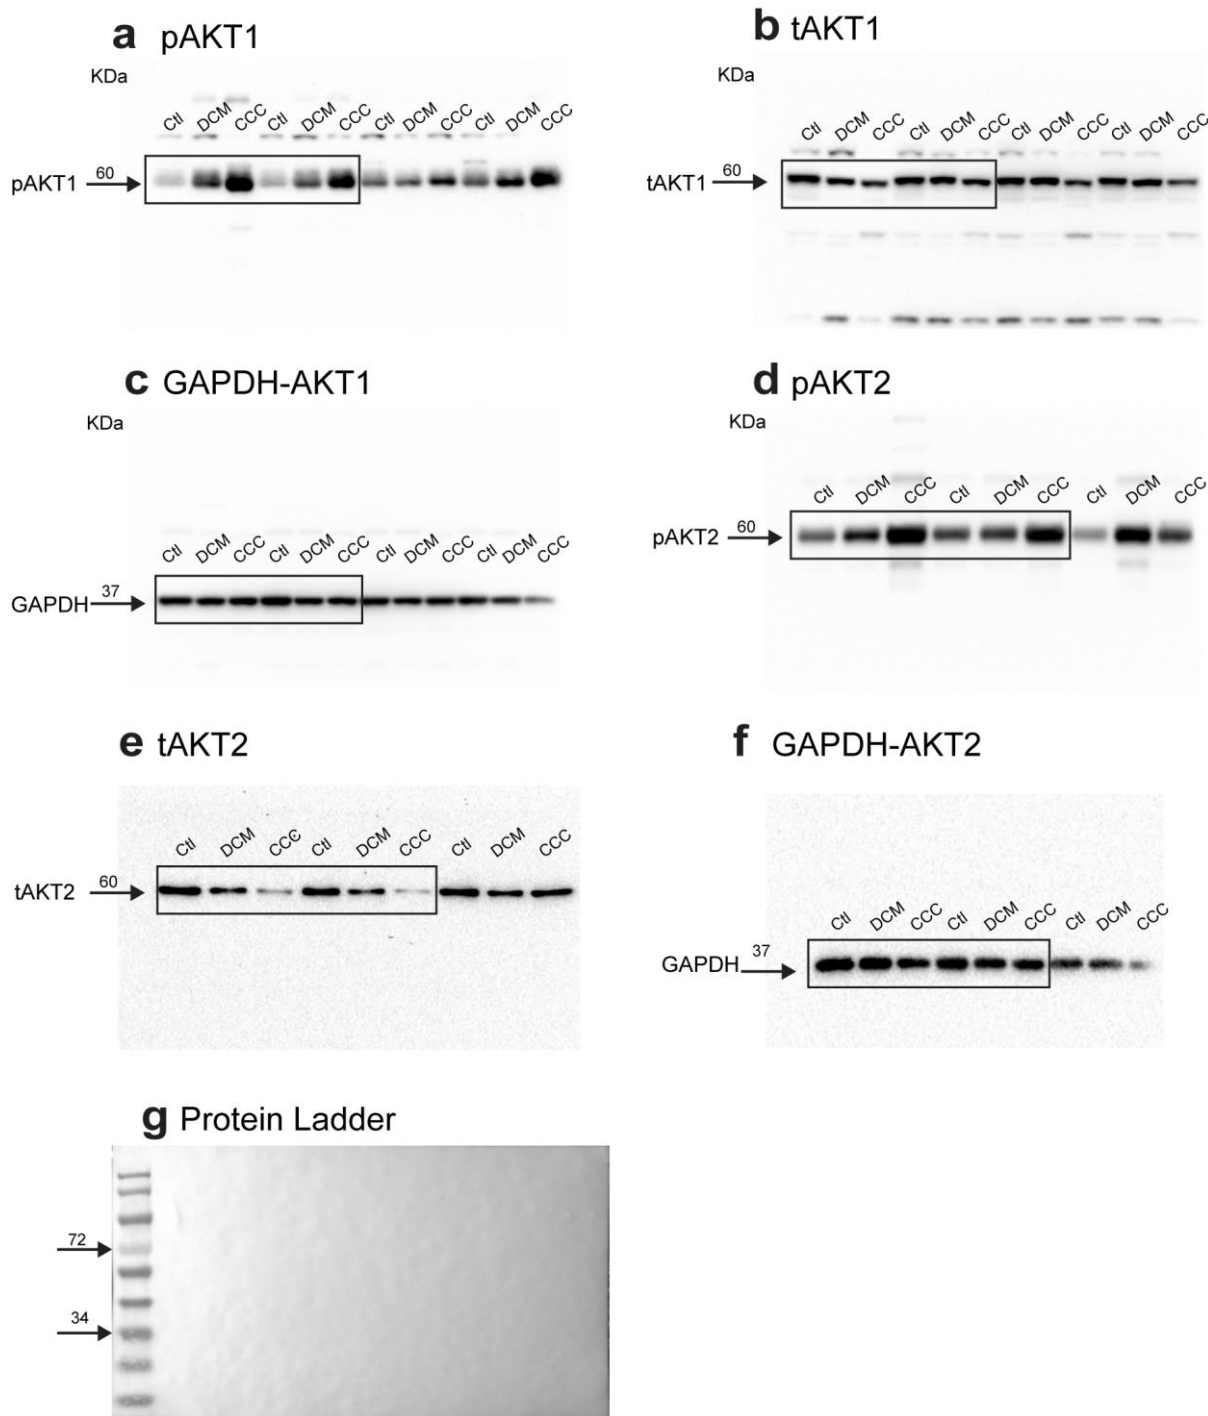

Supplementary Figure 10. Uncropped scans of the western blots presented in main figure 9.

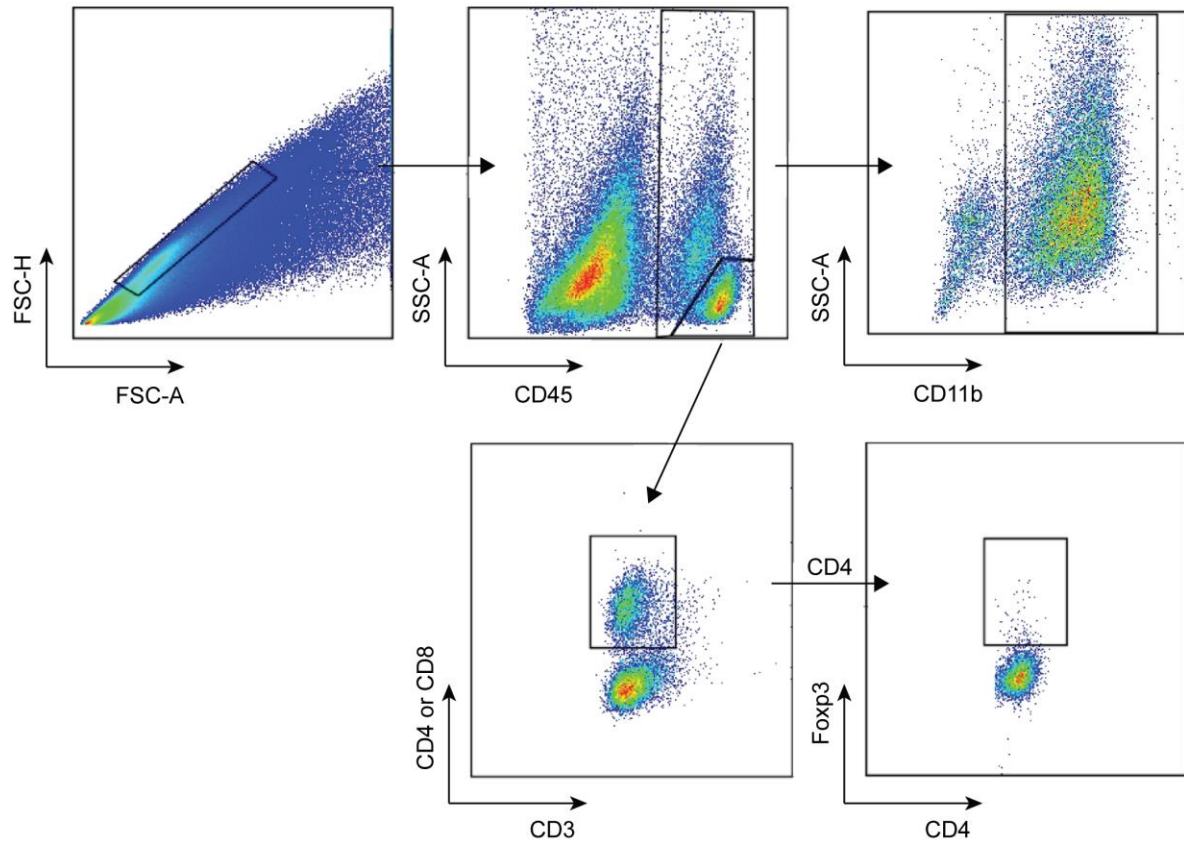

**Supplementary Figure 11. Representative gating strategies for flow cytometry analysis.**

FSC-H/FSC-A preliminary gate was performed for all cytometry analysis to exclude cell debris and cell doublets. Next, CD45<sup>+</sup> cells were gated on two populations according their relative complexity (SSC). The percentage of CD3<sup>+</sup>, CD4<sup>+</sup>, CD8<sup>+</sup> cells was evaluated within the less complex subpopulation and the frequency of CD11b<sup>+</sup> cells was evaluated within the most complex cell subpopulation.

**Supplementary Table 1 Multiplex analyses of cytokines/chemokines profile in the heart tissue of WT and *Pik3cg*<sup>-/-</sup> mice after *T. cruzi* infection**

| Proinflammatory cytokines (pg g <sup>-1</sup> ) |                         |                         |                        |                       |                   |                   |                    |                   |
|-------------------------------------------------|-------------------------|-------------------------|------------------------|-----------------------|-------------------|-------------------|--------------------|-------------------|
| Group                                           | IL-1 $\beta$            | TNF- $\alpha$           | IFN- $\gamma$          | IL-6                  | IL-12 (p40)       | IL12(p70)         | IL-17              | IL-1 $\alpha$     |
| WT NI                                           | 303.9 $\pm$ 75.36       | 9.478 $\pm$ 1.996       | 543.3 $\pm$ 68.42      | 321.3 $\pm$ 32.47     | 229.8 $\pm$ 7.371 | 52.58 $\pm$ 12.55 | 14.65 $\pm$ 2.224  | 1588 $\pm$ 140.6  |
| <i>Pik3cg</i> <sup>-/-</sup> NI                 | 181.9 $\pm$ 29.49       | 7.377 $\pm$ 1.565       | 259.4 $\pm$ 66.68      | 180.5 $\pm$ 8.488     | 165.3 $\pm$ 40.45 | 36.62 $\pm$ 3.041 | 14.45 $\pm$ 0.8474 | 776.7 $\pm$ 134.2 |
| WT 18dpi                                        | 190.9 $\pm$ 46.50       | 7.156 $\pm$ 1.643       | 1839 $\pm$ 199.5       | 409.0 $\pm$ 54.76     | 419.1 $\pm$ 67.39 | 81.69 $\pm$ 17.14 | 19.32 $\pm$ 3.457  | 2028 $\pm$ 547.6  |
| <i>Pik3cg</i> <sup>-/-</sup> 18dpi              | 763.3 $\pm$ 108.3***### | 26.38 $\pm$ 4.808***### | 6417 $\pm$ 929.7***### | 8192 $\pm$ 1908***### | 513.6 $\pm$ 105.5 | 111.3 $\pm$ 23.73 | 20.32 $\pm$ 3.969  | 1848 $\pm$ 385.1  |

  

| Proinflammatory cytokines (pg g <sup>-1</sup> ) |                   |                   |                  | Chemokines (pg g <sup>-1</sup> ) |                        |                        |                        |                        |
|-------------------------------------------------|-------------------|-------------------|------------------|----------------------------------|------------------------|------------------------|------------------------|------------------------|
| Group                                           | IL-2              | IL-7              | IL-9             | IL-15                            | MIP-1 $\beta$          | MIG                    | Eotaxin                | IP-10                  |
| WT NI                                           | 176.4 $\pm$ 16.62 | 37.89 $\pm$ 4.388 | 19870 $\pm$ 2902 | 686.7 $\pm$ 59.36                | 68.69 $\pm$ 24.53      | 7511 $\pm$ 1017        | 425.3 $\pm$ 34.17      | 403.2 $\pm$ 27.89      |
| <i>Pik3cg</i> <sup>-/-</sup> NI                 | 98.55 $\pm$ 11.46 | 27.05 $\pm$ 3.003 | 14520 $\pm$ 2443 | 592.7 $\pm$ 92.31                | 15.26 $\pm$ 7.711      | 6010 $\pm$ 263.4       | 429.2 $\pm$ 23.71      | 346.4 $\pm$ 43.40      |
| WT 18dpi                                        | 88.29 $\pm$ 13.05 | 32.61 $\pm$ 3.671 | 12770 $\pm$ 1081 | 580.1 $\pm$ 46.51                | 22080 $\pm$ 1050###    | 232800 $\pm$ 25090###  | 1834 $\pm$ 94.61###    | 17840 $\pm$ 914.9###   |
| <i>Pik3cg</i> <sup>-/-</sup> 18dpi              | 81.68 $\pm$ 9.106 | 36.91 $\pm$ 4.564 | 18090 $\pm$ 5018 | 661.6 $\pm$ 131.3                | 33730 $\pm$ 3535***### | 369300 $\pm$ 57980*### | 3255 $\pm$ 124.5***### | 35760 $\pm$ 2673***### |

  

| Chemokines (pg g <sup>-1</sup> )   |                        |                   |                        |                        |                         |                        | Growth Factors (pg g <sup>-1</sup> ) |
|------------------------------------|------------------------|-------------------|------------------------|------------------------|-------------------------|------------------------|--------------------------------------|
| Group                              | MIP-1 $\alpha$         | RANTES            | LIX                    | MIP-2                  | MCP-1                   | KC                     | G-CSF                                |
| WT NI                              | 166.0 $\pm$ 102.5      | 66.02 $\pm$ 3.436 | 1475 $\pm$ 264.9       | 245.3 $\pm$ 162.6      | 591.4 $\pm$ 90.30       | 449.6 $\pm$ 34.39      | 56.29 $\pm$ 6.367                    |
| <i>Pik3cg</i> <sup>-/-</sup> NI    | 461.3 $\pm$ 54.81      | 45.45 $\pm$ 4.277 | 851.8 $\pm$ 28.12      | 429.0 $\pm$ 61.00      | 473.8 $\pm$ 47.60       | 343.1 $\pm$ 25.36      | 41.81 $\pm$ 5.944                    |
| WT 18dpi                           | 3696 $\pm$ 255.2###    | 17090 $\pm$ 7405  | 1087 $\pm$ 179.8       | 427.5 $\pm$ 137.8      | 10140 $\pm$ 991.8       | 859.9 $\pm$ 82.31      | 74.88 $\pm$ 24.75                    |
| <i>Pik3cg</i> <sup>-/-</sup> 18dpi | 7789 $\pm$ 498.2***### | 90870 $\pm$ 41570 | 3661 $\pm$ 178.1***### | 4728 $\pm$ 992.6***### | 67310 $\pm$ 10770***### | 4180 $\pm$ 397.6***### | 1091 $\pm$ 150.3***###               |

  

| Growth Factors (pg g <sup>-1</sup> ) |                         |                      | Antiinflammatory (pg g <sup>-1</sup> ) |                   |                      |                   |                   |                    |
|--------------------------------------|-------------------------|----------------------|----------------------------------------|-------------------|----------------------|-------------------|-------------------|--------------------|
| Group                                | LIF                     | M-CSF                | VEGF                                   | IL-5              | IL-13                | IL-3              | IL-10             | IL-4               |
| WT NI                                | 28.74 $\pm$ 2.688       | 447.8 $\pm$ 75.99    | 496.3 $\pm$ 109.7                      | 66.73 $\pm$ 16.32 | 1023 $\pm$ 101.0     | 20.48 $\pm$ 4.059 | 156.8 $\pm$ 13.27 | 18.51 $\pm$ 2.611  |
| <i>Pik3cg</i> <sup>-/-</sup> NI      | 27.24 $\pm$ 0.9582      | 151.6 $\pm$ 24.52    | 486.4 $\pm$ 24.28                      | 21.18 $\pm$ 2.395 | 822.3 $\pm$ 87.52    | 12.10 $\pm$ 1.140 | 128.8 $\pm$ 22.90 | 12.92 $\pm$ 0.9351 |
| WT 18dpi                             | 31.50 $\pm$ 4.076       | 277.5 $\pm$ 15.43    | 90.82 $\pm$ 29.91###                   | 36.41 $\pm$ 7.510 | 519.7 $\pm$ 182.5    | 10.72 $\pm$ 1.091 | 83.38 $\pm$ 10.37 | 24.68 $\pm$ 1.868  |
| <i>Pik3cg</i> <sup>-/-</sup> 18dpi   | 182.2 $\pm$ 42.27***### | 522.3 $\pm$ 58.94*## | 41.32 $\pm$ 7.177###                   | 40.98 $\pm$ 8.933 | 122.5 $\pm$ 29.95### | 14.42 $\pm$ 2.429 | 127.8 $\pm$ 47.21 | 26.93 $\pm$ 2.987  |

\* $P < 0.05$ , \*\* $P < 0.01$  and \*\*\* $P < 0.001$  relative to WT infected group and # $P < 0.05$ , ## $P < 0.01$  and ### $P < 0.001$  relative to non-infected group (one-way ANOVA with Tukey's post-hoc test). Mean  $\pm$  s.e.m.

**Supplementary Table 2 Multiplex analyses of cytokines/chemokines profile in the heart tissue of WT and *Pik3cg*<sup>KD/KD</sup> mice after *T. cruzi* infection**

| Group                                | Proinflammatory cytokines (pg g <sup>-1</sup> ) |                     |                    |                   |                   |                   |                   |                   |
|--------------------------------------|-------------------------------------------------|---------------------|--------------------|-------------------|-------------------|-------------------|-------------------|-------------------|
|                                      | IL-6                                            | IFN- $\gamma$       | TNF- $\alpha$      | IL-1 $\beta$      | IL-7              | IL12(p70)         | IL-17             | IL-15             |
| WT NI                                | 321.3 $\pm$ 32.47                               | 543.3 $\pm$ 68.42   | 9.478 $\pm$ 1.996  | 303.9 $\pm$ 75.36 | 37.89 $\pm$ 4.388 | 52.58 $\pm$ 12.55 | 14.65 $\pm$ 2.224 | 686.7 $\pm$ 59.36 |
| WT 18dpi                             | 704.9 $\pm$ 193.0                               | 1289 $\pm$ 62.53    | 18.34 $\pm$ 8.474  | 349.9 $\pm$ 72.09 | 51.84 $\pm$ 33.02 | 59.82 $\pm$ 30.70 | 16.55 $\pm$ 4.443 | 647.1 $\pm$ 163.0 |
| <i>Pik3cg</i> <sup>KD/KD</sup> 18dpi | 15410 $\pm$ 3479***#                            | 3647 $\pm$ 803.9**# | 46.21 $\pm$ 9.218# | 492.3 $\pm$ 23.11 | 18.91 $\pm$ 5.447 | 44.99 $\pm$ 8.644 | 10.48 $\pm$ 1.141 | 488.5 $\pm$ 57.68 |

| Group                                | Proinflammatory cytokines (pg g <sup>-1</sup> ) |                      |                      |                   | Chemokines (pg g <sup>-1</sup> ) |                      |                        |                        |
|--------------------------------------|-------------------------------------------------|----------------------|----------------------|-------------------|----------------------------------|----------------------|------------------------|------------------------|
|                                      | IL-12(p40)                                      | IL-2                 | IL-1 $\alpha$        | IL-9              | MIG                              | MIP-1 $\beta$        | MIP-1 $\alpha$         | Eotaxin                |
| WT NI                                | 229.8 $\pm$ 7.371                               | 176.4 $\pm$ 16.62    | 1588 $\pm$ 140.6     | 19870 $\pm$ 2902  | 7511 $\pm$ 1017                  | 68.69 $\pm$ 24.53    | 166.0 $\pm$ 102.5      | 425.3 $\pm$ 34.17      |
| WT 18dpi                             | 386.5 $\pm$ 118.8                               | 57.92 $\pm$ 11.93### | 594.3 $\pm$ 121.2### | 11510 $\pm$ 1345# | 212400 $\pm$ 53880##             | 38990 $\pm$ 21700### | 4066 $\pm$ 238.9###    | 1592 $\pm$ 210.3###    |
| <i>Pik3cg</i> <sup>KD/KD</sup> 18dpi | 304.3 $\pm$ 56.68                               | 40.47 $\pm$ 5.109### | 501.8 $\pm$ 34.91### | 12130 $\pm$ 2001  | 189800 $\pm$ 26750#              | 34030 $\pm$ 4971###  | 7652 $\pm$ 243.5***### | 3073 $\pm$ 193.2***### |

| Group                                | Chemokines (pg g <sup>-1</sup> ) |                     |                        |                        |                        |                   | Growth factors (pg g <sup>-1</sup> ) |
|--------------------------------------|----------------------------------|---------------------|------------------------|------------------------|------------------------|-------------------|--------------------------------------|
|                                      | IP-10                            | MIP-2               | MCP-1                  | LIX                    | KC                     | RANTES            | LIF                                  |
| WT NI                                | 403.2 $\pm$ 27.89                | 245.3 $\pm$ 162.6   | 591.4 $\pm$ 90.30      | 1475 $\pm$ 264.9       | 449.6 $\pm$ 34.39      | 66.02 $\pm$ 3.436 | 28.74 $\pm$ 2.688                    |
| WT 18dpi                             | 18540 $\pm$ 1629###              | 694.3 $\pm$ 202.6   | 15950 $\pm$ 1389###    | 1093 $\pm$ 135.4       | 1249 $\pm$ 130.3###    | 19360 $\pm$ 4867# | 44.34 $\pm$ 14.02                    |
| <i>Pik3cg</i> <sup>KD/KD</sup> 18dpi | 21850 $\pm$ 1596###              | 6659 $\pm$ 1874***# | 61920 $\pm$ 8352***### | 4672 $\pm$ 360.9***### | 5716 $\pm$ 764.2***### | 14050 $\pm$ 6155  | 344.7 $\pm$ 56.12***###              |

| Group                                | Growth factors (pg g <sup>-1</sup> ) |                    |                      | Antiinflammatory (pg g <sup>-1</sup> ) |                     |                   |                   |                   |
|--------------------------------------|--------------------------------------|--------------------|----------------------|----------------------------------------|---------------------|-------------------|-------------------|-------------------|
|                                      | G-CSF                                | M-CSF              | VEGF                 | IL-10                                  | IL-13               | IL-5              | IL-3              | IL-4              |
| WT NI                                | 56.29 $\pm$ 6.367                    | 447.8 $\pm$ 75.99  | 496.3 $\pm$ 109.7    | 156.8 $\pm$ 13.27                      | 1023 $\pm$ 101.0    | 66.73 $\pm$ 16.32 | 20.48 $\pm$ 4.059 | 18.51 $\pm$ 2.611 |
| WT 18dpi                             | 171.0 $\pm$ 33.57                    | 365.7 $\pm$ 78.93  | 17.78 $\pm$ 3.931### | 129.5 $\pm$ 32.46                      | 641.5 $\pm$ 185.1   | 42.72 $\pm$ 13.46 | 11.15 $\pm$ 1.423 | 15.99 $\pm$ 3.002 |
| <i>Pik3cg</i> <sup>KD/KD</sup> 18dpi | 8270 $\pm$ 2222**#                   | 800.5 $\pm$ 117.7* | 14.35 $\pm$ 1.994### | 103.9 $\pm$ 15.86                      | 189.9 $\pm$ 81.88## | 39.84 $\pm$ 13.88 | 10.10 $\pm$ 1.192 | 16.64 $\pm$ 3.240 |

\* $P$ <0.05, \*\* $P$ <0.01 and \*\*\* $P$ <0.001 relative to WT infected group and # $P$ <0.05, ## $P$ <0.01 and ### $P$ <0.001 relative to non-infected group (one-way ANOVA with Tukey's post-hoc test). Mean  $\pm$  s.e.m.

**Supplementary Table 3** List of real-time PCR primers

|                 | <b>Gene</b>   | <b>Sequence</b>                                                                     |                                                                            |
|-----------------|---------------|-------------------------------------------------------------------------------------|----------------------------------------------------------------------------|
| <b>Human</b>    | <i>PIK3CA</i> | fwd: 5'- TCAAAGGATTGGGCACTTTT - 3'<br>rev: 5'- AATACATCCCACATGCACGA - 3'            |                                                                            |
|                 | <i>PIK3CB</i> | fwd: 5'- CAGTCAACATCAGCGCAAAG - 3'<br>rev: 5'- ACAAGGAAAAACAGGAAATACAGAA - 3'       |                                                                            |
|                 | <i>PIK3CD</i> | fwd: 5'- AAATTTGAACGGTTCCGGGG - 3'<br>rev: 5'- CCTCCTCTGTTTTCCCCAGT - 3'            |                                                                            |
|                 | <i>PIK3CG</i> | fwd: 5'- CATATTGACTTCGGGCACATTCTTG - 3'<br>rev: 5'- GTCTCTGCAAACCTTCGATCTGATC - 3'  |                                                                            |
|                 | <i>TNF</i>    | fwd: 5'- AAGCCTCTAGCCCATGTTGT - 3'<br>rev: 5'- CAGATAGATGGGCTCATAACC - 3'           |                                                                            |
|                 | <i>IFNG</i>   | fwd: 5'- TGCACCTCATTGAGATGTAG - 3'<br>rev: 5'- AGCCATCACTTGGATGAGTT - 3'            |                                                                            |
|                 | <i>CCL5</i>   | fwd: 5'- TCATTGCTACTGCCCTCTGC - 3'<br>rev: 5'- CGTCGTGGTCAGAATCTGGG - 3'            |                                                                            |
|                 | <i>GAPDH</i>  | fwd: 5'- TGAGTGTGGCAGGGACT - 3'<br>rev: 5'- AGGGTGGTGGACCTCAT - 3'                  |                                                                            |
|                 | <b>Mouse</b>  | <i>Pik3ca</i>                                                                       | fwd: 5'- GATAAAGGTTGCCACGCAGT - 3'<br>rev: 5'- GCAGTTCAACAGCCACACAC - 3'   |
|                 |               | <i>Pik3cb</i>                                                                       | fwd: 5'- TGAAGCTAGCCCCTGTGACT - 3'<br>rev: 5'- GGGCAGGGTCTATTCATCA - 3'    |
|                 |               | <i>Pik3cd</i>                                                                       | fwd: 5'- CTGGAACAGCCATTCTCCAT - 3'<br>rev: 5'- TGACACAGTCTTGCACAGCA - 3'   |
|                 |               | <i>Pik3cg</i>                                                                       | fwd: 5'- ATTGCTCTGGCATTTCGATA - 3'<br>rev: 5'- TACGTTTTGGCAACAATTTCTT - 3' |
|                 |               | <i>T-bet</i>                                                                        | fwd: 5'- AACCAGTATCCTGTTCCCAGC - 3'<br>rev: 5'- TGTCGCCACTGGAAGGATAG - 3'  |
|                 |               | <i>Gata-3</i>                                                                       | fwd: 5'- CTCCTTTTTGCTCTCCTTTTC - 3'<br>rev: 5'- AAGAGATGAGGACTGGAGTG - 3'  |
| <i>Foxp3</i>    |               | fwd: 5'- ACAACCTGAGCCTGCACAAGT - 3'<br>rev: 5'- GCCCACCTTTTCTTGGTTTTG - 3'          |                                                                            |
| <i>Rorγt</i>    |               | fwd: 5'- TGGAAGATGTGGACTTCGTTT - 3'<br>rev: 5'- TGGTTCCTCAAGTTCAGGAT - 3'           |                                                                            |
| <i>T. cruzi</i> |               | fwd: 5'- AAATAATGTACGGG(T/G)GAGATGCATGA - 3'<br>rev: 5'- GGGTTCGATTGGGGTTGGTGT - 3' |                                                                            |
| <i>Gapdh</i>    |               | fwd: 5'- GTGGAGTCATACTGGAACATGTAG - 3'<br>rev: 5'- AATGGATGAAGGTCGGTGTG - 3'        |                                                                            |
